# Supplementary material for: Decline of Tuberculosis Burden in Vietnam Measured by Consecutive National Surveys, 2007–2017
Source: PubMed Central journal article supplement (PMC7920672; doi:10.3201/eid2703.204253), 2021-03
Supplement: 20-4253-Techapp-s1.pdf [file 20-4253-Techapp-s1.pdf]

# Decline of Tuberculosis Burden in Vietnam Measured by Consecutive National Surveys, 2007–2017

## Appendix

**Appendix Table 1.** Comparison of sampling characteristics between the first and second National TB Prevalence surveys in Vietnam

| Characteristics | First survey (2007)                                                                                                                                                                                                                                                                                   | Second survey (2017)                                                                                                                                                                                                                                                        |
|-----------------|-------------------------------------------------------------------------------------------------------------------------------------------------------------------------------------------------------------------------------------------------------------------------------------------------------|-----------------------------------------------------------------------------------------------------------------------------------------------------------------------------------------------------------------------------------------------------------------------------|
| Sampling frame  | Multistage sampling: Districts selected proportional to population size, then communes selected proportional to population size, then subcommunes selected by simple random sampling, and including all households in the selected subcommune.<br><i>Stratification by area (urban/rural/remote)*</i> | Multistage sampling: Districts selected proportional to population size, then communes selected proportional to population size, then subcommunes selected by simple random sampling, and including all households in the selected subcommune.<br><i>No stratification*</i> |
| Enumeration     | All who have lived in the household for $\geq 3$ months*<br>Military camps and prisons excluded                                                                                                                                                                                                       | All who have lived in the household for $\geq 2$ weeks*<br>Military camps and prisons excluded                                                                                                                                                                              |
| Eligibility     | All who are mentally able to understand the study procedures and the risks and benefits of participation, and confirmed that they were available to attend the survey field procedures*                                                                                                               | All who are mentally able to understand the study procedures and the risks and benefits of participation                                                                                                                                                                    |

\*Italics indicate differences in sampling characteristics between first and second surveys

**Appendix Table 2.** Comparison of screening and diagnosis procedures between the first and second national TB prevalence surveys in Vietnam

| Methodology             | First survey (2007)                                                                                                                   | Second survey (2017)                                                                                                                                                        |
|-------------------------|---------------------------------------------------------------------------------------------------------------------------------------|-----------------------------------------------------------------------------------------------------------------------------------------------------------------------------|
| Screening interview     | Questions on cough and TB treatment history                                                                                           | Questions on cough and TB treatment history                                                                                                                                 |
| Chest radiography       | Digital for 42/70 clusters,<br><i>70x70mm photofluorography film for the other clusters*</i>                                          | Digital for all cluster                                                                                                                                                     |
| Sputum smear microscopy | <i>2 spot samples in local district laboratories by field laboratory teams*</i><br>1 morning sample in central laboratories           | <i>No spot samples*</i><br>1 morning sample in central laboratories                                                                                                         |
| Culture                 | <i>No MGIT applied*</i><br>LJ on morning sample after smear (1 slope), using modified Petrov method with 4% NaOH* for decontamination | <i>MGIT on morning sample after smear in all clusters (1 tube) and* LJ on the same sample (after MGIT) in 72/82 clusters (1 slope), using 3% NaOH* for decontamination.</i> |

\*Italics indicate differences in methodology between first and second surveys

**Appendix Table 3.** Criteria of participants eligible for sputum examination during the first and second national TB prevalence surveys in Vietnam

| Criterion               | First survey (2007)                                                  | Second survey (2017)                                                 | Definition used for comparison between surveys  |
|-------------------------|----------------------------------------------------------------------|----------------------------------------------------------------------|-------------------------------------------------|
| Symptom screening       | Cough $\geq 2$ weeks <i>with sputum*</i>                             | Cough $\geq 2$ weeks                                                 | Cough $\geq 2$ weeks with sputum                |
| Pregnancy               | <i>Not available*</i>                                                | Cough <2 weeks and pregnant                                          | Not included as eligible for sputum examination |
| History of TB treatment | Current TB treatment or TB treatment $\leq 2$ y preceding the survey | Current TB treatment or TB treatment $\leq 2$ y preceding the survey | No adaptation needed                            |
| Chest x-ray screening   | Chest x-ray suggesting TB                                            | Chest x-ray suggesting TB                                            | No adaptation needed                            |

\*Italics indicate differences in eligibility criteria between first and second surveys

**Appendix Table 4.** Comparison of symptoms consistent with TB reported during the in-depth interview by participants who initially screened positive for TB and survey TB cases found during the first and second national TB prevalence surveys in Vietnam

| Characteristic                 | First survey (2007) |      | Second survey (2017) |      | p-value* |
|--------------------------------|---------------------|------|----------------------|------|----------|
|                                | n                   | %    | n                    | %    |          |
| Screened positive participants | 7,529               |      | 4,595                |      |          |
| Cough                          | 5,158               | 68.5 | 3,170                | 69.0 | 0.581    |
| Cough ≥2 weeks                 | 4,541               | 60.3 | 2,791                | 60.7 | 0.641    |
| Cough with sputum              | 4,803               | 63.8 | 2,856                | 62.2 | 0.070    |
| Hemoptysis                     | 135                 | 1.2  | 68                   | 1.5  | 0.192    |
| Fever                          | 821                 | 10.9 | 517                  | 11.3 | 0.554    |
| Weight loss                    | 887                 | 11.8 | 299                  | 6.5  | <0.001   |
| Night sweats                   | 470                 | 6.2  | 249                  | 5.4  | 0.063    |
| Any symptoms                   | 5,352               | 71.1 | 3,258                | 71.9 | 0.830    |
| Culture-positive TB cases      | 218                 |      | 125                  |      |          |
| Cough                          | 149                 | 68.4 | 79                   | 63.2 | 0.331    |
| Cough ≥2 weeks                 | 122                 | 56.0 | 69                   | 55.2 | 0.891    |
| Cough with sputum              | 140                 | 64.2 | 73                   | 58.4 | 0.285    |
| Hemoptysis                     | 12                  | 5.5  | 3                    | 2.4  | 0.176    |
| Fever                          | 32                  | 14.7 | 12                   | 9.6  | 0.176    |
| Weight loss                    | 36                  | 16.5 | 7                    | 5.6  | 0.003    |
| Night sweats                   | 17                  | 7.8  | 4                    | 3.2  | 0.087    |
| Any symptoms                   | 157                 | 72.0 | 79                   | 63.2 | 0.090    |

\*p-value ≤0.05 is statistically significant

**Appendix Table 5.** Comparison of prevalence per 100,000 adults of culture-positive tuberculosis in the first and second national TB prevalence surveys in Vietnam\*

| Characteristic | First survey (2007) |                              |                                  | Second survey (2017) |                              |                                  | Comparison      |                |       |                    |                 |       |
|----------------|---------------------|------------------------------|----------------------------------|----------------------|------------------------------|----------------------------------|-----------------|----------------|-------|--------------------|-----------------|-------|
|                | No.                 | Crude point estimate (95%CI) | Adjusted† point estimate (95%CI) | No.                  | Crude point estimate (95%CI) | Adjusted† point estimate (95%CI) | Crude % change‡ |                |       | Adjusted % change§ |                 |       |
|                |                     | %                            | 95%CI, %                         |                      | p-value¶                     | %                                | 95%CI, %        | p-value¶       |       |                    |                 |       |
| Overall        | 218                 | 191 (167–218)                | 199 (160–248)                    | 125                  | 142 (113–169)                | 125 (98–159)                     | -26.1           | -44.7 to -7.5  | 0.007 | -37.1              | -55.4 to -11.5  | 0.008 |
| Sex            |                     |                              |                                  |                      |                              |                                  |                 |                |       |                    |                 |       |
| M              | 171                 | 320 (276–372)                | 356 (307–412)                    | 92                   | 221 (180–271)                | 275 (226–334)                    | -31.1           | -51.6 to -10.5 | 0.004 | -18.0              | -42.2 to +16.3  | 0.269 |
| F              | 47                  | 77 (58–103)                  | 89 (66–119)                      | 33                   | 71 (51–100)                  | 92 (66–128)                      | -10.4           | -52.6 to +31.7 | 0.631 | +11.1              | -96.1 to +36.7  | 0.702 |
| Age group, y   |                     |                              |                                  |                      |                              |                                  |                 |                |       |                    |                 |       |
| 15–24          | 9                   | 32 (17–62)                   | 40 (21–76)                       | 0                    | 0                            | 0                                | NA              | NA             | NA    | NA                 | NA              | NA    |
| 25–34          | 22                  | 91 (60–138)                  | 102 (68–154)                     | 12                   | 68 (39–120)                  | 77 (44–135)                      | -25.0           | -84.5 to +34.5 | 0.422 | +19.0              | -50.2 to +194.1 | 0.687 |
| 35–44          | 48                  | 207 (156–275)                | 224 (169–297)                    | 21                   | 122 (80–188)                 | 143 (94–217)                     | -40.9           | -78.8 to -3.0  | 0.044 | -20.6              | -49.3 to +57.8  | 0.473 |
| 45–54          | 50                  | 271 (205–357)                | 304 (233–397)                    | 29                   | 169 (118–243)                | 209 (149–294)                    | -37.5           | -73.3 to -1.7  | 0.044 | -20.6              | -33.3 to +54.8  | 0.384 |
| 55–64          | 28                  | 314 (217–454)                | 353 (245–509)                    | 35                   | 265 (191–373)                | 344 (252–469)                    | -15.3           | -61.7 to +31.1 | 0.512 | +7.5               | -72.4 to +32.9  | 0.772 |
| ≥65            | 61                  | 534 (416–686)                | 597 (469–760)                    | 28                   | 258 (178–370)                | 346 (244–490)                    | -53.5           | -84.0 to -22.9 | 0.001 | -34.6              | -8.7 to +60.6   | 0.098 |
| Area           |                     |                              |                                  |                      |                              |                                  |                 |                |       |                    |                 |       |
| Urban          | 59                  | 181 (140–234)                | 202 (157–261)                    | 55                   | 193 (148–252)                | 232 (181–297)                    | +4.9            | -32.9 to +42.7 | 0.800 | +31.6              | -117.4 to +20.6 | 0.273 |
| Remote         | 52                  | 164 (125–216)                | 178 (136–234)                    | 23                   | 111 (74–167)                 | 160 (111–229)                    | -32.4           | -71.1 to +6.3  | 0.118 | -1.0               | -61.3 to +50.2  | 0.995 |
| Rural          | 107                 | 214 (177–259)                | 243 (201–294)                    | 47                   | 121 (91–162)                 | 150 (113–199)                    | -43.4           | -68.3 to -18.5 | 0.001 | -43.2              | -65.0 to -7.4   | 0.023 |
| Zone           |                     |                              |                                  |                      |                              |                                  |                 |                |       |                    |                 |       |
| North          | 102                 | 189 (155–229)                | 212 (175–257)                    | 38                   | 117 (85–161)                 | 146 (108–197)                    | -39.5           | -67.0 to -12.1 | 0.009 | -33.3              | -8.7 to +58.8   | 0.101 |
| Central        | 23                  | 130 (86–195)                 | 166 (110–252)                    | 24                   | 138 (92–205)                 | 174 (118–256)                    | +6.2            | -52.7 to +65.1 | 0.837 | -4.8               | -100.0 to +54.3 | 0.894 |
| South          | 93                  | 219 (179–269)                | 235 (192–288)                    | 63                   | 166 (130–212)                | 209 (165–266)                    | -24.5           | -52.0 to +3.1  | 0.085 | +2.0               | -69.5 to +38.7  | 0.939 |

\*NA, not available.

†Weighted prevalence adjusted based on multiple imputation of missing values, inverse probability weighting and post-stratification.

‡Proportion change of the crude prevalence in the second survey compared with the first survey.

§Proportion change of the weighted prevalence in the second survey compared with the first survey; +, increase; -, decrease.

¶P-value of corrected Pearson's chi-squared test to compare characteristics between the first survey and the second survey.

**Appendix Table 6.** Comparison of prevalence per 100,000 adults of smear-positive tuberculosis in the first survey and the second national TB prevalence surveys in Vietnam\*

| Characteristic | First survey (2007) |                              |                                  | Second survey (2017) |                              |                                  | Comparison      |                 |        |                    |                 |        |
|----------------|---------------------|------------------------------|----------------------------------|----------------------|------------------------------|----------------------------------|-----------------|-----------------|--------|--------------------|-----------------|--------|
|                | No.                 | Crude point estimate (95%CI) | Adjusted† point estimate (95%CI) | No.                  | Crude point estimate (95%CI) | Adjusted† point estimate (95%CI) | Crude % change‡ |                 |        | Adjusted % change§ |                 |        |
|                |                     | %                            | 95%CI, %                         |                      | p-value¶                     | %                                | 95%CI, %        | p-value¶        |        |                    |                 |        |
| Overall        | 105                 | 92 (76–111)                  | 99 (78–125)                      | 38                   | 43 (31–59)                   | 46 (32–68)                       | -53.0           | -77.2 to -28.7  | <0.001 | -53.1              | -69.7 to -27.0  | 0.001  |
| Sex            |                     |                              |                                  |                      |                              |                                  |                 |                 |        |                    |                 |        |
| Male           | 86                  | 161 (130–199)                | 181 (147–222)                    | 24                   | 58 (39–86)                   | 81 (56–117)                      | -64.2           | -89.7 to -38.7  | <0.001 | -64.0              | -78.4 to -40.1  | <0.001 |
| Female         | 19                  | 31 (20–49)                   | 36 (23–57)                       | 14                   | 30 (18–51)                   | 41 (26–67)                       | -3.1            | -70.9 to +64.7  | 0.929  | +4.2               | -53.9 to +132.6 | 0.578  |
| Age group      |                     |                              |                                  |                      |                              |                                  |                 |                 |        |                    |                 |        |
| 15–24          | 5                   | 18 (7–43)                    | 22 (9–52)                        | 0                    | 0                            | 0                                | NA              | NA              | NA     | NA                 | NA              | NA     |
| 25–34          | 9                   | 37 (19–71)                   | 42 (22–79)                       | 8                    | 45 (23–91)                   | 48 (24–95)                       | 22.2            | -84.7 to +129.1 | 0.680  | +13.6              | -58.5 to +212.5 | 0.248  |
| 35–44          | 29                  | 125 (87–180)                 | 133 (93–191)                     | 6                    | 35 (16–78)                   | 42 (20–90)                       | -72.0           | -114.7 to -29.4 | 0.004  | -71.2              | -87.6 to -32.9  | 0.026  |
| 45–54          | 27                  | 146 (100–213)                | 163 (112–237)                    | 11                   | 64 (36–116)                  | 88 (52–149)                      | -56.1           | -101.9 to -10.4 | 0.021  | -51.5              | -76.8 to +2.0   | 0.235  |
| 55–64          | 11                  | 123 (68–222)                 | 147 (84–260)                     | 10                   | 76 (41–141)                  | 115 (67–199)                     | -38.4           | -108.7 to +31.9 | 0.267  | -24.8              | -68.9 to +81.8  | 0.737  |
| ≥65            | 24                  | 210 (141–313)                | 244 (167–357)                    | 3                    | 27 (9–85)                    | 62 (26–149)                      | -86.9           | -129.5 to -44.2 | 0.001  | -73.8              | -91.1 to -22.5  | 0.019  |
| Area           |                     |                              |                                  |                      |                              |                                  |                 |                 |        |                    |                 |        |
| Urban          | 33                  | 101 (72–142)                 | 112 (80–158)                     | 23                   | 81 (54–122)                  | 99 (67–147)                      | -20.1           | -67.3 to +27.1  | 0.408  | -35.5              | -67.3 to +26.6  | 0.870  |
| Remote         | 22                  | 70 (46–106)                  | 77 (50–116)                      | 6                    | 29 (13–65)                   | 56 (30–103)                      | -58.3           | -111.8 to -4.9  | 0.057  | -46.2              | -72.9 to +7.5   | 0.587  |
| Rural          | 50                  | 100 (75–132)                 | 115 (88–151)                     | 9                    | 23 (12–45)                   | 34 (19–61)                       | -76.8           | -108.4 to -45.2 | <0.001 | -73.5              | -89.2 to -35.1  | 0.017  |

| Characteristic | First survey (2007) |                              |                                  | Second survey (2017) |                              |                                  | Comparison      |                 |          |                    |                |          |
|----------------|---------------------|------------------------------|----------------------------------|----------------------|------------------------------|----------------------------------|-----------------|-----------------|----------|--------------------|----------------|----------|
|                | No.                 | Crude point estimate (95%CI) | Adjusted† point estimate (95%CI) | No.                  | Crude point estimate (95%CI) | Adjusted† point estimate (95%CI) | Crude % change‡ |                 |          | Adjusted % change§ |                |          |
|                |                     |                              |                                  |                      |                              |                                  | %               | 95%CI, %        | p-value¶ | %                  | 95%CI, %       | p-value¶ |
| Zone           |                     |                              |                                  |                      |                              |                                  |                 |                 |          |                    |                |          |
| North          | 46                  | 85 (64–114)                  | 97 (73–130)                      | 5                    | 15 (6–37)                    | 31 (15–62)                       | -81.9           | -114.8 to -48.9 | <0.001   | -65.2              | -84.7 to -20.6 | 0.022    |
| Center         | 16                  | 90 (55–147)                  | 111 (68–180)                     | 11                   | 63 (35–114)                  | 80 (46–139)                      | -30.0           | -94.1 to +34.1  | 0.362    | -39.4              | -77.2 to +61.3 | 0.444    |
| South          | 43                  | 101 (75–137)                 | 108 (80–146)                     | 22                   | 58 (38–88)                   | 76 (51–111)                      | -43.0           | -81.2 to -4.7   | 0.032    | -53.5              | -76.5 to -8.3  | 0.047    |

\*NA, not available.

†Weighted prevalence adjusted based on multiple imputation of missing values, inverse probability weighting and post-stratification.

‡Proportion change of the crude prevalence in the second survey compared with the first survey.

§Proportion change of the weighted prevalence in the second survey compared with the first survey; +, increase; -, decrease.

¶P-value of corrected Pearson's chi-squared test to compare characteristics between the first survey and the second survey.

**Appendix Table 7.** Comparison of prevalence per 100,000 adults of smear-negative tuberculosis in the first survey and the second national TB prevalence surveys in Vietnam.

| Characteristic | First survey (2007) |                              |                                  | Second survey (2017) |                              |                                  | Comparison      |                |          |                    |                |          |
|----------------|---------------------|------------------------------|----------------------------------|----------------------|------------------------------|----------------------------------|-----------------|----------------|----------|--------------------|----------------|----------|
|                | No.                 | Crude point estimate (95%CI) | Adjusted† point estimate (95%CI) | No.                  | Crude point estimate (95%CI) | Adjusted† point estimate (95%CI) | Crude % change‡ |                |          | Adjusted % change§ |                |          |
|                |                     |                              |                                  |                      |                              |                                  | %               | 95%CI, %       | p-value¶ | %                  | 95%CI, %       | p-value¶ |
| Overall        | 113                 | 99 (82–119)                  | 100 (73–137)                     | 87                   | 99 (80–122)                  | 79 (59–105)                      | -1.1            | -29.0 to 26.7  | 0.938    | -21.3              | -49.7 to 22.0  | 0.679    |
| Sex            |                     |                              |                                  |                      |                              |                                  |                 |                |          |                    |                |          |
| Male           | 85                  | 159 (129–197)                | 175 (141–216)                    | 68                   | 163 (129–207)                | 194 (153–246)                    | + 2.5           | -29.8 to 34.8  | 0.878    | -24.8              | -51.9 to 19.0  | 0.662    |
| Female         | 28                  | 46 (32–67)                   | 53 (37–77)                       | 19                   | 41 (26–64)                   | 50 (32–79)                       | -15.4           | -69.3 to 38.4  | 0.579    | -23.7              | -65.6 to 69.5  | 0.939    |
| Age group      |                     |                              |                                  |                      |                              |                                  |                 |                |          |                    |                |          |
| 15–24          | 4                   | 14 (5–38)                    | 17 (6–47)                        | 0                    | 0                            | 0                                | NA              | NA             | NA       | NA                 | NA             | NA       |
| 25–34          | 13                  | 54 (31–92)                   | 61 (36–102)                      | 4                    | 23 (9–60)                    | 29 (11–76)                       | -57.7           | -126.0 to 20.6 | 0.579    | -55.8              | -91.2 to 122.2 | 0.648    |
| 35–44          | 19                  | 82 (52–128)                  | 90 (57–142)                      | 15                   | 87 (23–145)                  | 100 (60–166)                     | + 6.6           | -63.6 to 76.9  | 0.132    | -8.3               | -61.7 to 122.2 | 0.428    |
| 45–54          | 23                  | 124 (83–187)                 | 141 (93–212)                     | 18                   | 105 (66–167)                 | 121 (76–191)                     | -15.7           | -72.1 to 40.7  | 0.852    | -21.9              | -65.2 to 72.4  | 0.915    |
| 55–64          | 17                  | 190 (118–306)                | 206 (128–331)                    | 25                   | 190 (128–280)                | 228 (155–336)                    | -0.3            | -61.8 to 61.1  | 0.588    | + 29.9             | -32.0 to 150.0 | 0.528    |
| ≥65            | 37                  | 324 (235–447)                | 353 (258–483)                    | 25                   | 230 (156–340)                | 282 (192–414)                    | -31.8           | -74.0 to 10.3  | 0.991    | -16.0              | -56.3 to 61.3  | 0.728    |
| Area           |                     |                              |                                  |                      |                              |                                  |                 |                |          |                    |                |          |
| Urban          | 26                  | 80 (54–117)                  | 90 (61–131)                      | 32                   | 112 (79–159)                 | 132 (94–185)                     | + 36.6          | -24.9 to 98.2  | 0.24     | + 3.1              | -52.8 to 127.3 | 0.188    |
| Remote         | 30                  | 95 (66–136)                  | 102 (71–145)                     | 17                   | 82 (71–132)                  | 103 (64–166)                     | -13.4           | -67.9 to 41.1  | 0.636    | -25.4              | -70.3 to 104.1 | 0.842    |
| Rural          | 57                  | 114 (88–148)                 | 128 (98–166)                     | 38                   | 98 (51–135)                  | 116 (84–160)                     | -14.0           | -51.7 to 23.7  | 0.47     | -38.3              | -63.9 to 6.4   | 0.327    |
| Zone           |                     |                              |                                  |                      |                              |                                  |                 |                |          |                    |                |          |
| North          | 56                  | 104 (80–135)                 | 114 (88–149)                     | 33                   | 102 (72–143)                 | 114 (82–160)                     | -4.8            | -46.9 to 37.4  | 0.826    | -23.1              | -62.1 to 56.3  | 0.734    |
| Center         | 7                   | 39 (19–82)                   | 55 (27–113)                      | 13                   | 75 (43–128)                  | 93 (54–160)                      | + 89.0          | -37.6 to 215.6 | 0.174    | + 35.1             | -50.7 to 270.4 | 0.320    |
| South          | 50                  | 118 (89–156)                 | 127 (96–167)                     | 41                   | 108 (79–146)                 | 133 (97–182)                     | -8.6            | -47.9 to 30.8  | 0.671    | -28.1              | -62.3 to 37.0  | 0.582    |

\*NA, not available.

†Weighted prevalence adjusted based on multiple imputation of missing values, inverse probability weighting and post-stratification.

‡Proportion change of the crude prevalence in the second survey compared with the first survey.

§Proportion change of the weighted prevalence in the second survey compared with the first survey; +, increase; -, decrease.

¶P-value of corrected Pearson's chi-squared test to compare characteristics between the first survey and the second survey.
